# Supplementary material for: Genome Wide Methylome Alterations in Lung Cancer
Source: PubMed Central journal article supplement (PMC4684329; doi:10.1371/journal.pone.0143826), 2015-12-18

# Supplemental Figure S2

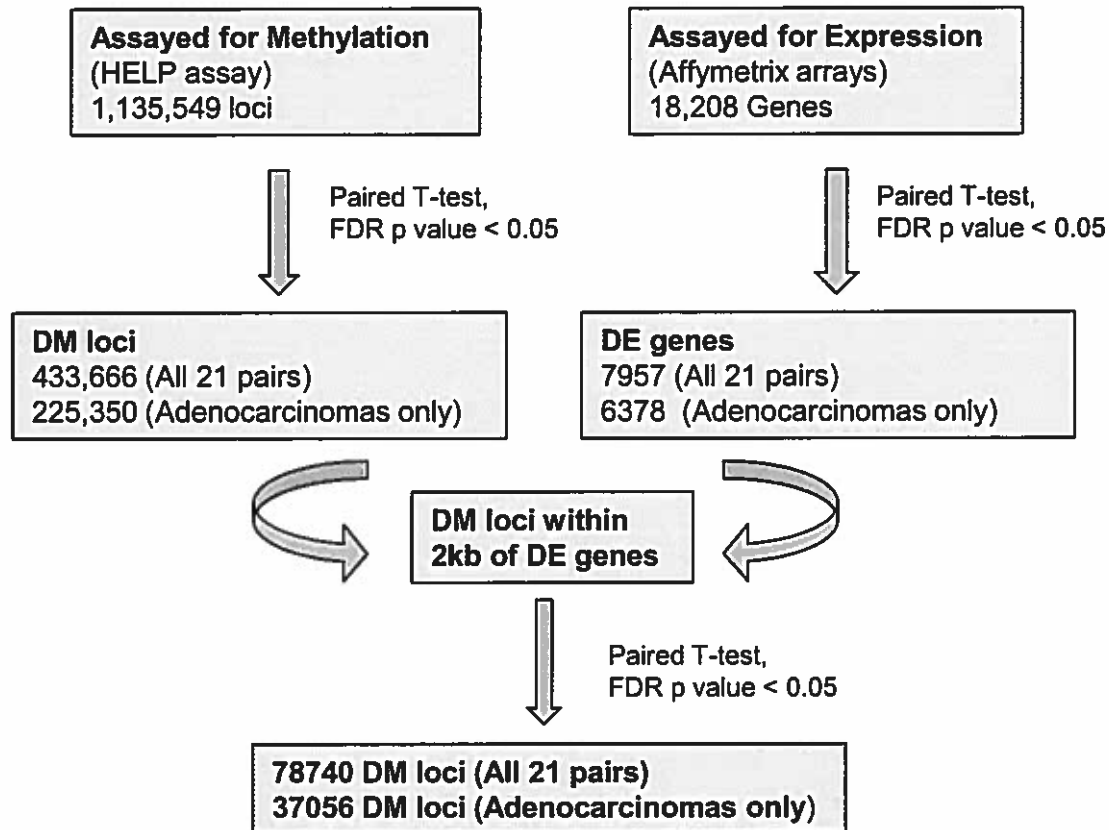

Supplement: pone.0143826.s002.pdf [file pone.0143826.s002.pdf]
