# Supplementary material for: Genome Wide Methylome Alterations in Lung Cancer
Source: PubMed Central journal article supplement (PMC4684329; doi:10.1371/journal.pone.0143826), 2015-12-18

# Suppl. Fig. S4

## PR- HYPERMETHYLATED- DOWNREGULATED

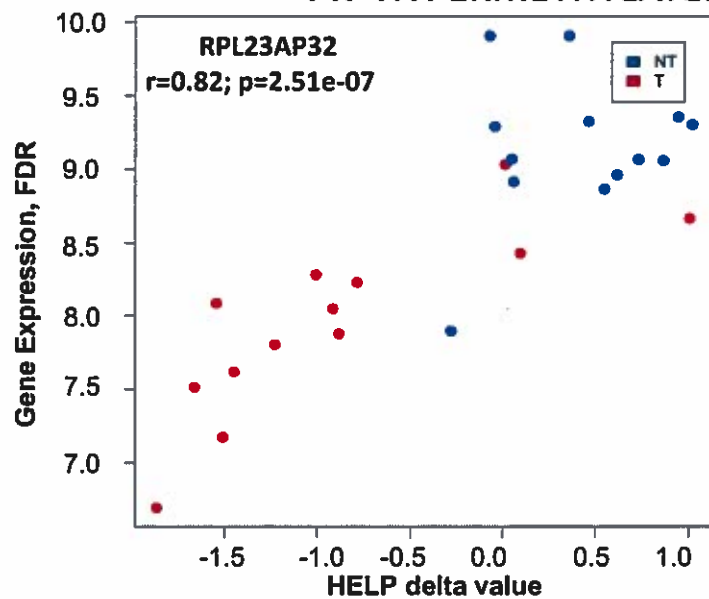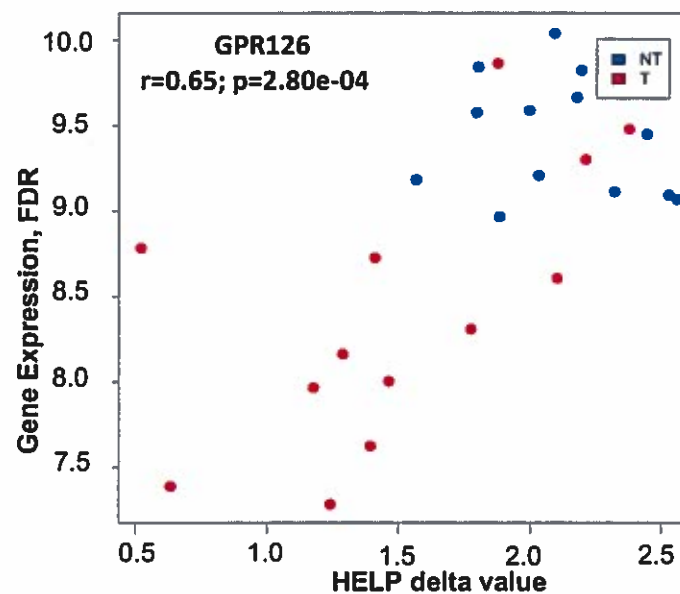

## GB- HYPOMETHYLATED- DOWNREGULATED

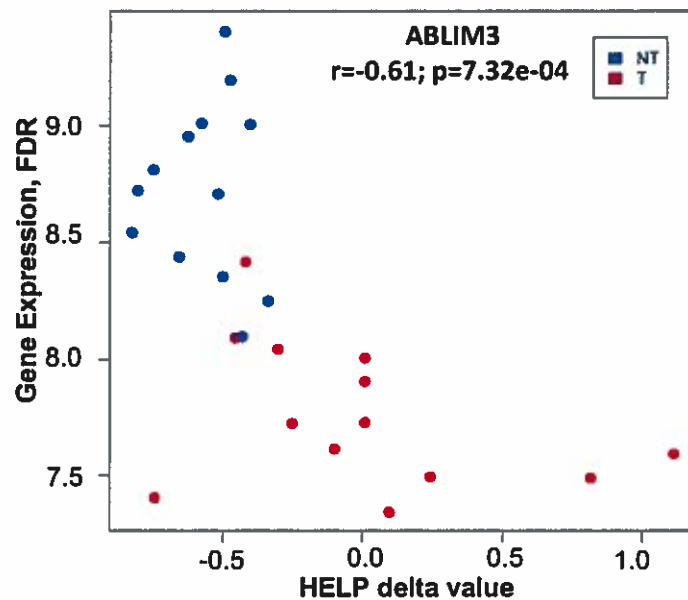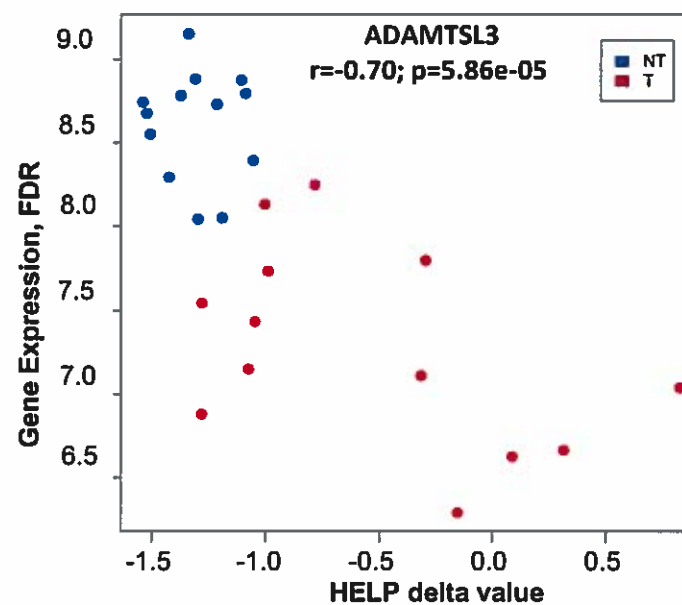

Supplement: pone.0143826.s004.pdf [file pone.0143826.s004.pdf]
