# Supplementary material for: Genome Wide Methylome Alterations in Lung Cancer
Source: PubMed Central journal article supplement (PMC4684329; doi:10.1371/journal.pone.0143826), 2015-12-18
Supplement: pone.0143826.s006.pdf [file pone.0143826.s006.pdf]

# Supplemental Figure S6

[Legend common to all 3 panels (S6A, S6B, S6C)]

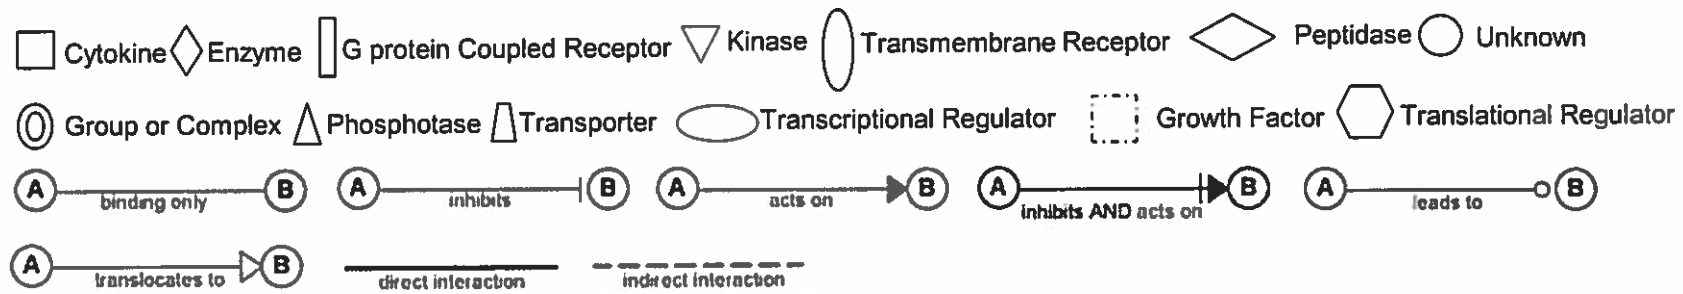

**Red = hypomethylated, Green = hypermethylated. White = Not detected as DM but included in the network by virtue of association with at least one DM gene.**

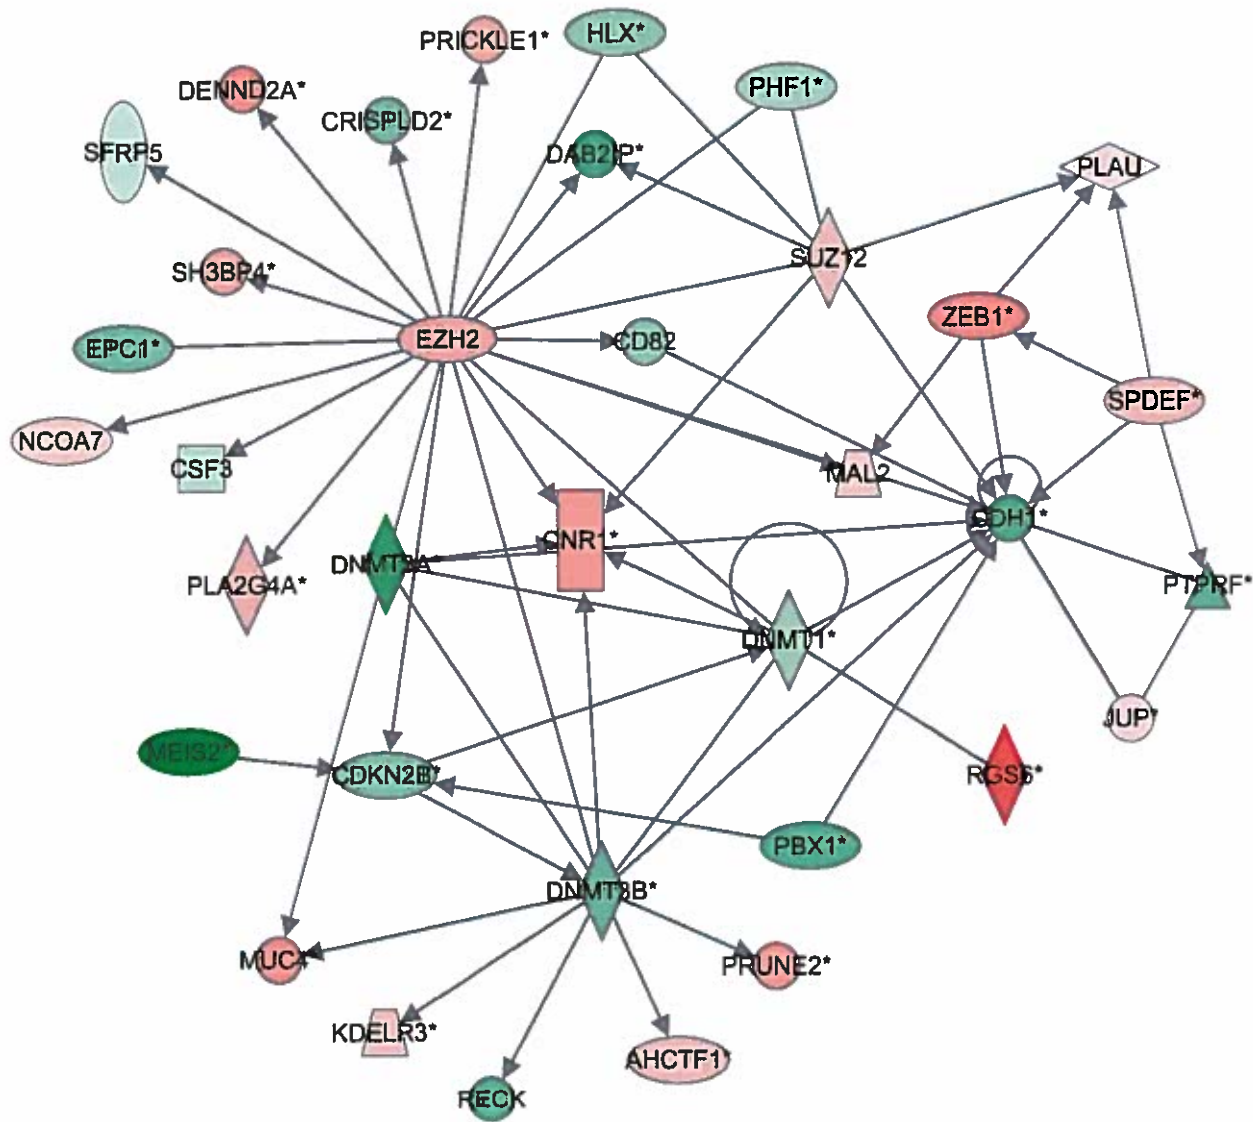

**DM LOCI WITHIN GENE BODIES,  
ALL NSCLC HISTOLOGIES**

S6B

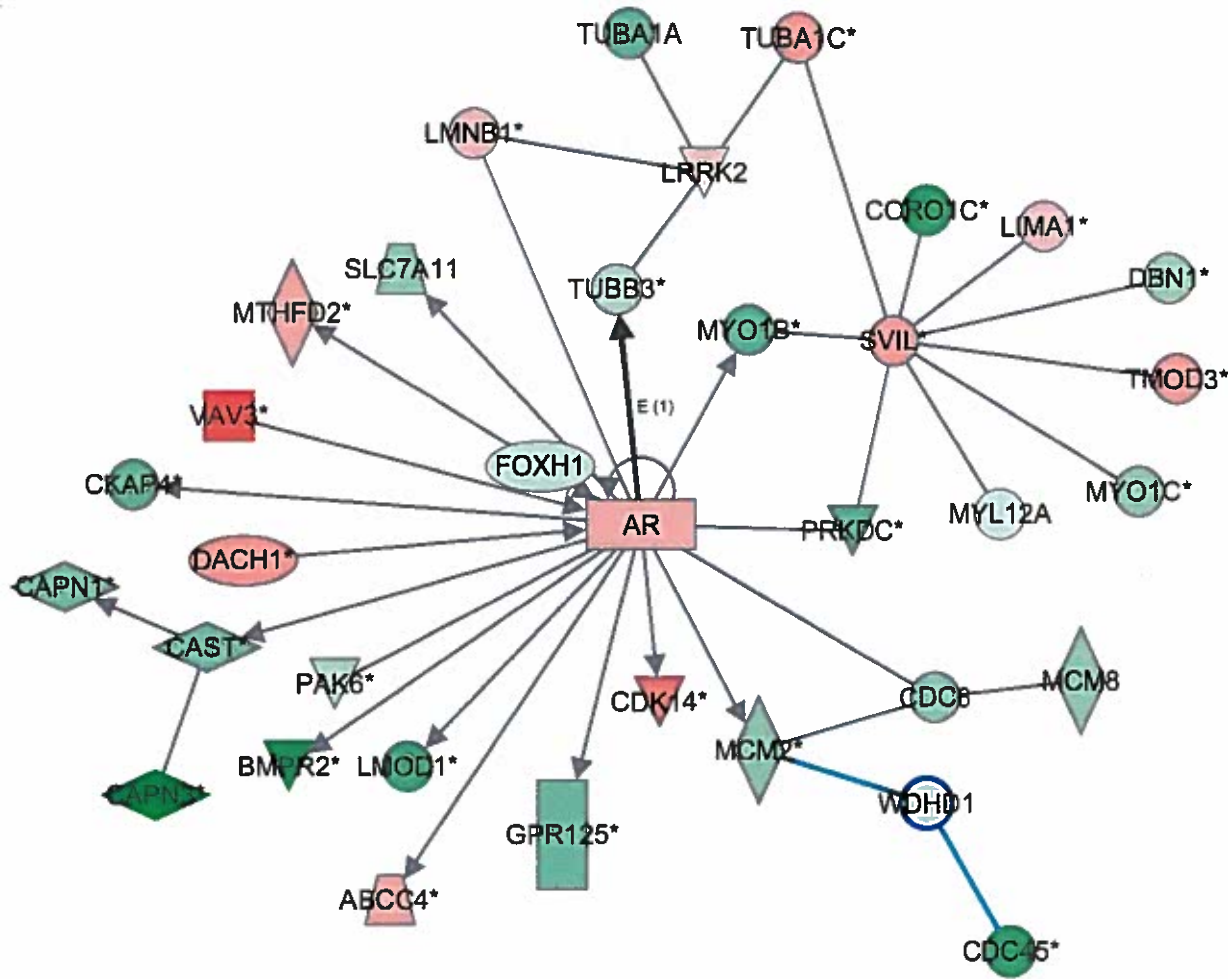

DM LOCI WITHIN GENE BODIES,  
ADENOCARCINOMAS only

# S6C

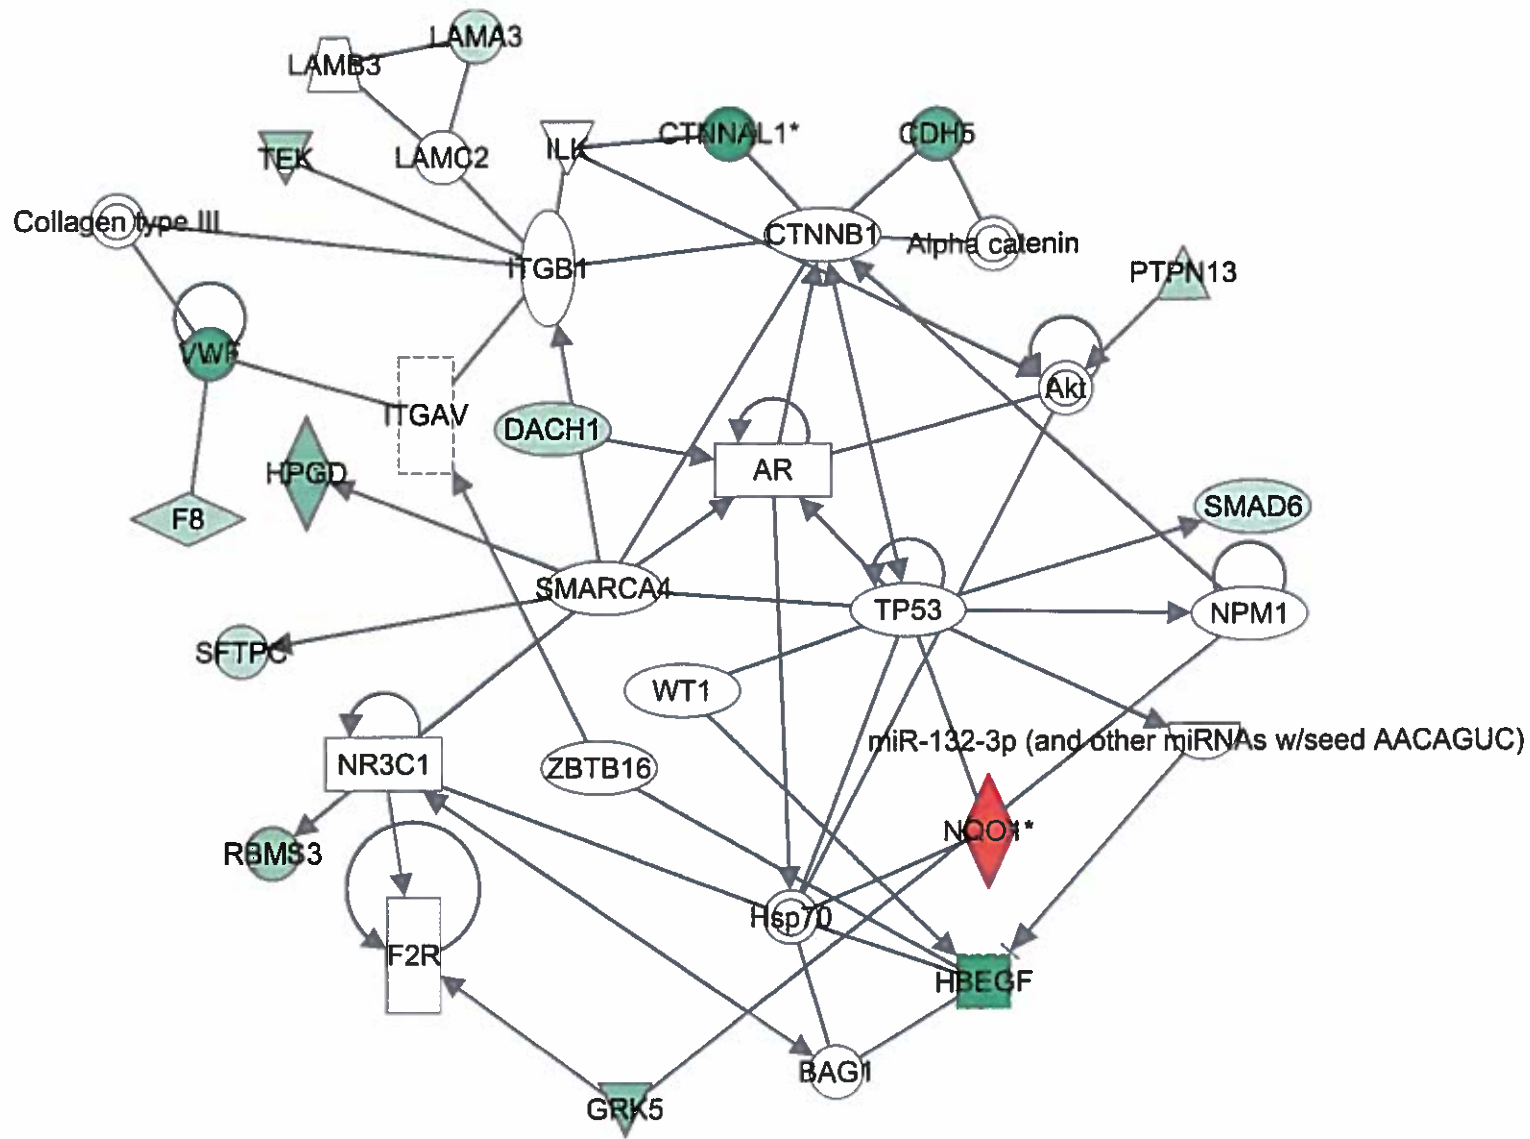

**DM+DE LOCI WITHIN PROMOTERS,  
ADENOCARCINOMAS only**
