# Supplementary material for: Genome Wide Methylome Alterations in Lung Cancer
Source: PubMed Central journal article supplement (PMC4684329; doi:10.1371/journal.pone.0143826), 2015-12-18
Supplement: pone.0143826.s008.pdf [file pone.0143826.s008.pdf]

**Supplementary Table 1: Donor Characteristics**

| Serial No. | Subject ID | Tumor Histology | Age | Gender | Smoking Status | Smoking Dose (Pack Years) | Gene expression |
|------------|------------|-----------------|-----|--------|----------------|---------------------------|-----------------|
| 1          | 538        | Ad              | 65  | 0      | 1              | 30                        | Y               |
| 2          | 541        | Sq              | 75  | 1      | 2              | 87                        | Y               |
| 3          | 542        | Ad              | 65  | 0      | 1              | 9                         | Y               |
| 4          | 543        | Ad              | 71  | 0      | 1              | 51                        | Y               |
| 5          | 551        | Ad              | 58  | 1      | 2              | 60                        | Y               |
| 6          | 552        | Sq              | 57  | 1      | 2              | 12                        | Y               |
| 7          | 558        | Ad              | 81  | 1      | 1              | 41                        | Y               |
| 8          | 560        | Ad              | 64  | 0      | 2              | 58                        | Y               |
| 9          | 561        | Sq              | 63  | 1      | 2              | 35                        | Y               |
| 10         | 566        | Sq              | 58  | 0      | 2              | 68                        | Y               |
| 11         | 581        | Sq              | 46  | 0      | 1              | 15                        | Y               |
| 12         | 596        | Sq              | 62  | 0      | 1              | 17                        | Y               |
| 13         | 603        | Ad              | 78  | 0      | 0              | 0                         | Y               |
| 14         | 606        | Ad              | 57  | 0      | 2              | 40                        | Y               |
| 15         | 610        | Ad              | 75  | 0      | 1              | 1                         | Y               |
| 16         | 619        | AdSq            | 77  | 0      | 1              | 16                        | Y               |
| 17         | 642        | Ad              | 55  | 0      | 2              | 10                        | Y               |
| 18         | 653        | Ad              | 64  | 0      | 1              | 20                        | Y               |
| 19         | 670        | AdSq            | 79  | 0      | 1              | 51                        | Y               |
| 20         | 675        | Ad              | 77  | 0      | 1              | 150                       | Y               |
| 21         | 692        | Ad              | 62  | 0      | 2              | 33                        | Y               |
| 22         | 699        | Ad              | NA  | 1      | 0              | 0                         | N               |
| 23         | 713        | Ad              | NA  | 0      | 0              | 0                         | N               |
| 24         | 716        | Ad              | NA  | 0      | 2              | 54                        | N               |
