# Supplementary material for: Genome Wide Methylome Alterations in Lung Cancer
Source: PubMed Central journal article supplement (PMC4684329; doi:10.1371/journal.pone.0143826), 2015-12-18
Supplement: pone.0143826.s009.pdf [file pone.0143826.s009.pdf]

## Supplementary Table 2: Top 25 differentially methylated loci

(A) All histologies, promoters, (B) All histologies, gene bodies, (C) Adenocarcinomas only, promoters (D) Adenocarcinomas only, Gene Bodies

Loci previously reported as DM are denoted by a superscript to the corresponding literature reference in the gene name.

| <b>S2A) Top 25 DM Loci across all Histologies within promoters</b>   |                                                                        |               |          |             |
|----------------------------------------------------------------------|------------------------------------------------------------------------|---------------|----------|-------------|
| GENE SYMBOL                                                          | FUNCTION                                                               | DELTA (log2)* | P-VALUE  | FDR P-VALUE |
| <b>HYPERMETHYLATED</b>                                               |                                                                        |               |          |             |
| C7orf54                                                              | chromosome 7 open reading frame 54                                     | -1.32         | 4.52E-07 | 8.00E-05    |
| DARS                                                                 | aspartyl-tRNA synthetase                                               | -1.22         | 3.42E-08 | 4.37E-05    |
| SPTAN1                                                               | spectrin, alpha, non-erythrocytic 1                                    | -1.17         | 6.03E-06 | 2.37E-04    |
| DOM3Z                                                                | dom-3 homolog Z ( <i>C. elegans</i> )                                  | -1.13         | 1.21E-04 | 1.36E-03    |
| PCNX                                                                 | pecanex homolog ( <i>Drosophila</i> )                                  | -1.13         | 7.59E-05 | 1.02E-03    |
| CTNNAL1 <sup>19</sup>                                                | catenin (cadherin n-associated protein), alpha-like 1                  | -1.12         | 3.49E-05 | 6.32E-04    |
| ZNF366                                                               | zinc finger protein 366                                                | -1.1          | 6.56E-05 | 9.27E-04    |
| CDKN2B <sup>4, 16</sup>                                              | cyclin-dependent kinase inhibitor 2B (p15, inhibits CDK4)              | -1.05         | 1.00E-04 | 1.21E-03    |
| UBE2E2                                                               | ubiquitin-conjugating enzyme E2E 2                                     | -1.03         | 8.70E-06 | 2.88E-04    |
| VTI1A                                                                | vesicle transport through interaction with t-SNAREs homolog 1A (yeast) | -1.01         | 3.35E-07 | 7.29E-05    |
| HIST1H1A <sup>16, 19</sup>                                           | histone cluster 1, H1a                                                 | -1.01         | 4.98E-06 | 2.15E-04    |
| TMF1                                                                 | TATA element modulatory factor 1                                       | -0.98         | 3.04E-06 | 1.68E-04    |
| LEAP2                                                                | liver expressed antimicrobial peptide 2                                | -0.97         | 2.42E-06 | 1.52E-04    |
| <b>HYPOMETHYLATED</b>                                                |                                                                        |               |          |             |
| NQO1                                                                 | NAD(P)H dehydrogenase, quinone 1                                       | 1.99          | 6.36E-07 | 8.90E-05    |
| SIRPB1 <sup>16</sup>                                                 | signal-regulatory protein beta 1                                       | 1.88          | 1.22E-06 | 1.13E-04    |
| UNC5CL                                                               | unc-5 homolog C ( <i>C. elegans</i> )-like                             | 1.8           | 1.73E-07 | 6.06E-05    |
| NFIA                                                                 | nuclear factor I/A                                                     | 1.58          | 3.11E-04 | 2.53E-03    |
| CST1                                                                 | cystatin SN                                                            | 1.44          | 1.42E-07 | 5.79E-05    |
| SIRPD <sup>16</sup>                                                  | signal-regulatory protein delta                                        | 1.43          | 8.55E-07 | 9.86E-05    |
| TMCO1                                                                | transmembrane and coiled-coil domains 1                                | 1.42          | 4.65E-07 | 8.07E-05    |
| CLDN18                                                               | claudin 18                                                             | 1.39          | 2.73E-06 | 1.60E-04    |
| KIAA1462                                                             | Junctional Protein Associated With Coronary Artery Disease             | 1.38          | 6.68E-06 | 2.50E-04    |
| SLC8A3                                                               | solute carrier family 8 (sodium/calcium exchanger), member 3           | 1.36          | 7.27E-06 | 2.62E-04    |
| C2orf40                                                              | chromosome 2 open reading frame 40                                     | 1.36          | 8.25E-07 | 9.73E-05    |
| CLEC4E                                                               | C-type lectin domain family 4, member E                                | 1.33          | 5.93E-07 | 8.69E-05    |
| <b>S2B) Top 25 DM Loci across all histologies within Gene Bodies</b> |                                                                        |               |          |             |
| GENE SYMBOL                                                          | FUNCTION                                                               | DELTA (log2)  | P-VALUE  | FDR P-VALUE |
| <b>HYPERMETHYLATED</b>                                               |                                                                        |               |          |             |
| NOL10                                                                | nucleolar protein 10                                                   | -2.20         | 6.22E-08 | 4.83E-05    |
| ARHGEF12                                                             | Rho guanine nucleotide exchange factor (GEF) 12                        | -1.93         | 7.34E-08 | 4.98E-05    |

|                        |                                                                                                               |       |          |          |
|------------------------|---------------------------------------------------------------------------------------------------------------|-------|----------|----------|
| UST                    | uronyl-2-sulfotransferase                                                                                     | -1.86 | 2.17E-06 | 1.44E-04 |
| RGS3                   | regulator of G-protein signaling 3                                                                            | -1.85 | 2.43E-07 | 6.63E-05 |
| MBNL2                  | muscleblind-like 2 (Drosophila)                                                                               | -1.84 | 8.50E-08 | 5.13E-05 |
| RXFP1                  | relaxin/insulin-like family peptide receptor 1                                                                | -1.81 | 1.53E-07 | 5.88E-05 |
| CLN8                   | ceroid-lipofuscinosis, neuronal 8 (epilepsy, progressive with mental retardation)                             | -1.81 | 8.44E-08 | 5.13E-05 |
| PASK                   | PAS domain containing serine/threonine kinase                                                                 | -1.77 | 1.32E-07 | 5.66E-05 |
| STARD13                | StAR-related lipid transfer (START) domain containing 13                                                      | -1.77 | 1.21E-06 | 1.13E-04 |
| PPM1H                  | protein phosphatase 1H (PP2C domain containing)                                                               | -1.76 | 8.96E-06 | 2.93E-04 |
| CENPO                  | centromere protein O                                                                                          | -1.74 | 1.38E-07 | 5.72E-05 |
| SH3BP5                 | SH3-domain binding protein 5 (BTK-associated)                                                                 | -1.74 | 2.11E-07 | 6.36E-05 |
| ANKS1A                 | ankyrin repeat and sterile alpha motif domain containing 1A                                                   | -1.74 | 9.91E-08 | 5.31E-05 |
| <b>HYPOMETHYLATED</b>  |                                                                                                               |       |          |          |
| FBXL7                  | F-box and leucine-rich repeat protein 7                                                                       | 2.44  | 5.52E-08 | 4.81E-05 |
| RYR2 <sup>19</sup>     | ryanodine receptor 2 (cardiac)                                                                                | 2.42  | 3.12E-08 | 4.36E-05 |
| NTRK3 <sup>19</sup>    | neurotrophic tyrosine kinase, receptor, type 3                                                                | 2.33  | 2.92E-08 | 4.36E-05 |
| ADAMTS12               | ADAM metalloproteinase with thrombospondin type 1 motif, 12                                                   | 2.32  | 1.09E-06 | 1.09E-04 |
| PARK2                  | Parkinson disease (autosomal recessive, juvenile) 2, parkin                                                   | 2.3   | 1.92E-08 | 4.15E-05 |
| FAM171A1               | family with sequence similarity 171, member A1                                                                | 2.28  | 3.02E-07 | 7.05E-05 |
| PEG3                   | paternally expressed 3; PEG3 antisense RNA (non-protein coding); zinc finger, imprinted 2                     | 2.24  | 9.06E-08 | 5.22E-05 |
| TNR                    | tenascin R (restrictin, janusin)                                                                              | 2.23  | 2.10E-07 | 6.35E-05 |
| DPP6 <sup>16, 19</sup> | dipeptidyl-peptidase 6                                                                                        | 2.22  | 9.82E-08 | 5.29E-05 |
| ST6GALNAC3             | ST6 (alpha-N-acetyl-neuraminyl-2,3-beta-galactosyl-1,3)-N-acetylgalactosaminide alpha-2,6-sialyltransferase 3 | 2.21  | 4.17E-08 | 4.53E-05 |
| SLC8A3                 | solute carrier family 8 (sodium/calcium exchanger), member 3                                                  | 2.15  | 1.30E-08 | 4.15E-05 |
| BCAS3                  | breast carcinoma amplified sequence 3                                                                         | 2.14  | 2.76E-08 | 4.36E-05 |

### S2C) Top 25 DM Loci among Adenocarcinomas within Promoters

|                           |                                                    |       |          |          |
|---------------------------|----------------------------------------------------|-------|----------|----------|
| <b>HYPERMETHYLATED</b>    |                                                    |       |          |          |
| RPL23AP32                 | ribosomal protein L23a pseudogene 32               | -1.26 | 5.12E-05 | 1.10E-02 |
| mir-26a-1                 | mir-26a-1                                          | -1.23 | 1.00E-04 | 1.11E-02 |
| SPTAN1                    | spectrin, alpha, non-erythrocytic 1 (alpha-fodrin) | -1.08 | 2.79E-04 | 1.25E-02 |
| RASL12                    | RAS-like, family 12                                | -1.02 | 6.27E-05 | 1.10E-02 |
| SLC27A6 <sup>19, 21</sup> | solute carrier family 27 (fatty acid transporter)  | -0.96 | 1.57E-04 | 1.16E-02 |
| KPNB1                     | karyopherin (importin) beta 1                      | -0.93 | 6.97E-04 | 1.56E-02 |
| APIP                      | APAF1 interacting protein                          | -0.9  | 1.94E-03 | 2.26E-02 |
| UBE2E2                    | ubiquitin-conjugating enzyme E2E 2                 | -0.89 | 4.74E-04 | 1.40E-02 |

|                       |                                                                             |       |          |          |
|-----------------------|-----------------------------------------------------------------------------|-------|----------|----------|
| GIMAP1                | GTPase, IMAP family member 1                                                | -0.88 | 1.41E-03 | 1.99E-02 |
| GBA2                  | glucosidase, beta (bile acid) 2                                             | -0.88 | 1.74E-05 | 1.10E-02 |
| m                     | schlafen family member 13                                                   | -0.88 | 9.17E-04 | 1.70E-02 |
| FIG4                  | FIG4 homolog ( <i>S. cerevisiae</i> )                                       | -0.87 | 1.85E-04 | 1.18E-02 |
| SNRK                  | SNF related kinase                                                          | -0.87 | 2.08E-03 | 2.33E-02 |
| <b>HYPOMETHYLATED</b> |                                                                             |       |          |          |
| NQO1                  | NAD(P)H dehydrogenase, quinone 1                                            | 1.84  | 6.64E-05 | 1.10E-02 |
| UNC5CL                | unc-5 homolog C ( <i>C. elegans</i> )-like                                  | 1.74  | 1.52E-05 | 1.10E-02 |
| SIRPB1 <sup>19</sup>  | signal-regulatory protein beta 1                                            | 1.73  | 1.86E-04 | 1.18E-02 |
| DAB2                  | disabled homolog 2, mitogen-responsive phosphoprotein ( <i>Drosophila</i> ) | 1.6   | 6.68E-05 | 1.10E-02 |
| GIMAP5                | GTPase, IMAP family member 5                                                | 1.5   | 4.14E-06 | 1.10E-02 |
| SCN4A                 | sodium channel, voltage-gated, type IV, alpha subunit                       | 1.48  | 1.47E-05 | 1.10E-02 |
| DAB2                  | disabled homolog 2, mitogen-responsive phosphoprotein ( <i>Drosophila</i> ) | 1.45  | 5.88E-04 | 1.49E-02 |
| OVCH1                 | ovochoymase 1                                                               | 1.31  | 2.65E-04 | 1.24E-02 |
| MRPL38                | mitochondrial ribosomal protein L38                                         | 1.29  | 4.58E-05 | 1.10E-02 |
| MAEL                  | maelstrom homolog ( <i>Drosophila</i> )                                     | 1.27  | 2.89E-03 | 2.68E-02 |
| IGKC                  | immunoglobulin kappa constant                                               | 1.21  | 3.57E-05 | 1.10E-02 |
| RHOH                  | ras homolog family member H                                                 | 1.13  | 6.61E-04 | 1.54E-02 |

#### **S2D) Top 25 DM Loci among Adenocarcinomas within Gene Bodies**

|                           |                                                                                       |       |          |          |
|---------------------------|---------------------------------------------------------------------------------------|-------|----------|----------|
| <b>HYPERMETHYLATED</b>    |                                                                                       |       |          |          |
| AKAP13                    | A kinase (PRKA) anchor protein 13                                                     | -1.57 | 1.56E-04 | 1.16E-02 |
| ANKRD44                   | ankyrin repeat domain 44                                                              | -1.61 | 6.10E-04 | 1.50E-02 |
| ANKS1A                    | ankyrin repeat and sterile alpha motif domain containing 1A                           | -1.52 | 2.02E-04 | 1.19E-02 |
| CCDC92                    | coiled-coil domain containing 92                                                      | -1.56 | 1.87E-05 | 1.10E-02 |
| GALNT1                    | (GalNAc-T1) galactosamine:polypeptide N-acetylgalactosaminyltransferase 1 (GalNAc-T1) | -1.64 | 7.76E-05 | 1.10E-02 |
| LRRFIP1                   | leucine rich repeat (in FLII) interacting protein 1                                   | -1.5  | 2.03E-04 | 1.19E-02 |
| MEIS2                     | Meis homeobox 2                                                                       | -1.62 | 2.26E-05 | 1.10E-02 |
| PRKCE                     | protein kinase C, epsilon                                                             | -1.52 | 3.21E-04 | 1.28E-02 |
| RNF144B                   | ring finger protein 144B                                                              | -1.53 | 3.02E-04 | 1.27E-02 |
| ROS1                      | c-ros oncogene 1, receptor tyrosine kinase                                            | -1.58 | 1.60E-04 | 1.16E-02 |
| RXFP1                     | relaxin/insulin-like family peptide receptor 1                                        | -1.65 | 1.24E-04 | 1.12E-02 |
| SLC7A1                    | solute carrier family 7 (cationic amino acid transporter, y+ system), member 1        | -1.52 | 1.25E-04 | 1.13E-02 |
| SPTBN1                    | spectrin, beta, non-erythrocytic 1                                                    | -1.55 | 2.45E-05 | 1.10E-02 |
| <b>HYPOMETHYLATED</b>     |                                                                                       |       |          |          |
| FAM171A1                  | family with sequence similarity 171, member A1                                        | 2.22  | 3.49E-05 | 1.10E-02 |
| FBXL7                     | F-box and leucine-rich repeat protein 7                                               | 2.13  | 1.12E-04 | 1.12E-02 |
| PARK2                     | Parkinson disease (autosomal recessive, juvenile) 2, parkin                           | 2.12  | 2.19E-05 | 1.10E-02 |
| BCAS3                     | breast carcinoma amplified sequence 3                                                 | 2.09  | 3.39E-05 | 1.10E-02 |
| RYR2                      | ryanodine receptor 2 (cardiac)                                                        | 2.07  | 1.63E-04 | 1.16E-02 |
| CNTNAP5 <sup>16, 21</sup> | contactin associated protein-like 5                                                   | 1.98  | 3.04E-05 | 1.10E-02 |
| RHOJ <sup>19</sup>        | ras homolog gene family, member J                                                     | 1.97  | 4.93E-05 | 1.10E-02 |
| PRKCQ                     | protein kinase C, theta                                                               | 1.95  | 4.26E-04 | 1.36E-02 |

|                            |                                  |      |          |          |
|----------------------------|----------------------------------|------|----------|----------|
| ZNF423                     | zinc finger protein 423          | 1.93 | 1.71E-04 | 1.17E-02 |
| TNR                        | tenascin R (restrictin, janusin) | 1.93 | 2.72E-04 | 1.24E-02 |
| CDH13 <sup>4, 19, 21</sup> | cadherin 13, H-cadherin (heart)  | 1.93 | 1.09E-05 | 1.10E-02 |
| TPK1                       | thiamin pyrophosphokinase 1      | 1.92 | 5.44E-05 | 1.10E-02 |

\*DELTA: (log base 2) is the magnitude of differential methylation in T vs NT; negative implies hypermethylation
