# Supplementary material for: Genome Wide Methylome Alterations in Lung Cancer
Source: PubMed Central journal article supplement (PMC4684329; doi:10.1371/journal.pone.0143826), 2015-12-18
Supplement: pone.0143826.s010.pdf [file pone.0143826.s010.pdf]

### Supplementary Table 3: Methylation-Expression overlay.

Genes also identified as top 25 in the Methylation-alone analysis are denoted by an asterisk (\*). Genes previously reported as DM as well as DE are denoted by a superscript to the corresponding reference in the gene name.

#### Supplementary Table 3A TOP 25 DIFFERENTIALLY METHYLATED LOCI IN PROMOTERS IN THE VICINITY OF DE GENES

| GENE SYMBOL             | FUNCTION                                                                               | DELTA*<br>Log2 | P-VALUE  | FDR<br>P-VALUE | GENE<br>EXP |
|-------------------------|----------------------------------------------------------------------------------------|----------------|----------|----------------|-------------|
| <b>HYPERMETHYLATED</b>  |                                                                                        |                |          |                |             |
| HBEGF                   | heparin-binding EGF-like growth factor                                                 | -0.91          | 1.78E-05 | 4.27E-04       | DOWN        |
| DPT                     | dermatopontin                                                                          | -0.84          | 1.19E-05 | 3.41E-04       | DOWN        |
| AGER                    | advanced glycosylation end product-specific receptor                                   | -0.8           | 1.90E-04 | 1.83E-03       | DOWN        |
| SPARCL1 <sup>*,19</sup> | SPARC-like 1 (hevin)                                                                   | -0.8           | 3.24E-05 | 6.05E-04       | DOWN        |
| PTPRM                   | protein tyrosine phosphatase, receptor type, M                                         | -0.75          | 8.78E-05 | 1.11E-03       | DOWN        |
| ARHGEF6                 | Rac/Cdc42 guanine nucleotide exchange factor (GEF) 6                                   | -0.75          | 7.08E-06 | 2.58E-04       | DOWN        |
| TMEM88                  | transmembrane protein 88                                                               | -0.71          | 3.99E-05 | 6.84E-04       | DOWN        |
| SEMA6A                  | sema domain, transmembrane domain (TM), and cytoplasmic domain, (semaphorin) 6A        | -0.67          | 1.75E-04 | 1.73E-03       | DOWN        |
| HPGD                    | hydroxyprostaglandin dehydrogenase 15-(NAD)                                            | -0.63          | 8.92E-05 | 1.12E-03       | DOWN        |
| PEBP4                   | phosphatidylethanolamine-binding protein 4                                             | -0.6           | 1.32E-04 | 1.44E-03       | DOWN        |
| RBMS3                   | RNA binding motif, single stranded interacting protein                                 | -0.57          | 6.47E-04 | 4.17E-03       | DOWN        |
| FILIP1                  | filamin A interacting protein 1                                                        | -0.56          | 4.59E-05 | 7.45E-04       | DOWN        |
| CCBE1                   | collagen and calcium binding EGF domains 1                                             | -0.53          | 3.97E-04 | 2.98E-03       | DOWN        |
| <b>HYPOMETHYLATED</b>   |                                                                                        |                |          |                |             |
| NQO1 <sup>*</sup>       | NAD(P)H dehydrogenase, quinone 1                                                       | 1.99           | 6.36E-07 | 8.90E-05       | UP          |
| CST1 <sup>*</sup>       | cystatin SN                                                                            | 1.44           | 1.42E-07 | 5.79E-05       | UP          |
| TNS4                    | tensin 4                                                                               | 0.92           | 1.12E-05 | 3.31E-04       | UP          |
| FUT2                    | fucosyltransferase 2 (secretor status included)                                        | 0.9            | 8.79E-05 | 1.11E-03       | UP          |
| MELK <sup>*</sup>       | maternal embryonic leucine zipper kinase                                               | 0.81           | 2.11E-03 | 9.65E-03       | UP          |
| FAM83A <sup>*,19</sup>  | family with sequence similarity 83, member A                                           | 0.81           | 9.49E-05 | 1.17E-03       | UP          |
| MMP9 <sup>*</sup>       | matrix metalloproteinase 9 (gelatinase B, 92kDa gelatinase, 92kDa type IV collagenase) | 0.8            | 1.29E-03 | 6.79E-03       | UP          |
| SLCO1B3                 | solute carrier organic anion transporter family, member 1B3                            | 0.79           | 8.81E-04 | 5.17E-03       | UP          |
| AKR1B10                 | aldo-keto reductase family 1,                                                          | 0.79           | 6.95E-04 | 4.38E-03       | UP          |

|                                                                                              |                                                                                                                                                            |       |          |          |      |
|----------------------------------------------------------------------------------------------|------------------------------------------------------------------------------------------------------------------------------------------------------------|-------|----------|----------|------|
|                                                                                              | member B10 (aldose reductase);<br>aldo-keto reductase family 1,<br>member B10-like                                                                         |       |          |          |      |
| ABCA12                                                                                       | ATP-binding cassette, sub-family<br>A (ABC1), member 12                                                                                                    | 0.69  | 5.61E-04 | 3.78E-03 | UP   |
| KRT15                                                                                        | keratin 15                                                                                                                                                 | 0.56  | 1.24E-04 | 1.38E-03 | UP   |
| TYMS                                                                                         | thymidylate synthetase                                                                                                                                     | 0.47  | 5.85E-04 | 3.89E-03 | UP   |
|                                                                                              |                                                                                                                                                            |       |          |          |      |
| <b>S3B) TOP 25 DIFFERENTIALLY METHYLATED LOCI IN GENE BODIES IN THE VICINITY OF DE GENES</b> |                                                                                                                                                            |       |          |          |      |
| <b>HYPERMETHYLATED</b>                                                                       |                                                                                                                                                            |       |          |          |      |
| FERMT1                                                                                       | fermitin family homolog 1<br>(Drosophila)                                                                                                                  | -0.89 | 1.01E-05 | 3.12E-04 | UP   |
| SLC7A5                                                                                       | solute carrier family 7 (cationic<br>amino acid transporter, y+<br>system), member 5                                                                       | -0.88 | 6.98E-06 | 2.56E-04 | UP   |
| FAP                                                                                          | fibroblast activation protein, alpha                                                                                                                       | -0.86 | 6.06E-04 | 3.99E-03 | UP   |
| KRT15                                                                                        | keratin 15                                                                                                                                                 | -0.82 | 1.99E-04 | 1.88E-03 | UP   |
| ETV4                                                                                         | ets variant 4                                                                                                                                              | -0.79 | 1.84E-06 | 1.34E-04 | UP   |
| TFAP2A                                                                                       | transcription factor AP-2 alpha<br>(activating enhancer binding<br>protein 2 alpha)                                                                        | -0.78 | 3.62E-05 | 6.45E-04 | UP   |
| TPX2                                                                                         | TPX2, microtubule-associated,<br>homolog (Xenopus laevis)                                                                                                  | -0.74 | 2.08E-04 | 1.94E-03 | UP   |
| FOXM1                                                                                        | forkhead box M1                                                                                                                                            | -0.74 | 1.43E-05 | 3.77E-04 | UP   |
| AFAP1                                                                                        | actin filament associated protein 1                                                                                                                        | -0.71 | 7.30E-06 | 2.62E-04 | UP   |
| SIX1                                                                                         | SIX homeobox 1                                                                                                                                             | -0.7  | 6.67E-04 | 4.26E-03 | UP   |
| GREM1                                                                                        | gremlin 1, cysteine knot<br>superfamily, homolog (Xenopus<br>laevis)                                                                                       | -0.69 | 4.18E-04 | 3.09E-03 | UP   |
| AURKA                                                                                        | aurora kinase A; aurora kinase A<br>pseudogene 1                                                                                                           | -0.68 | 7.44E-04 | 4.59E-03 | UP   |
| TYMS                                                                                         | thymidylate synthetase                                                                                                                                     | -0.66 | 5.92E-08 | 4.83E-05 | UP   |
| <b>HYPOMETHYLATED</b>                                                                        |                                                                                                                                                            |       |          |          |      |
| AGBL1                                                                                        | ATP/GTP binding protein-like 1                                                                                                                             | 2.11  | 9.75E-07 | 1.03E-04 | DOWN |
| RHOJ <sup>19</sup>                                                                           | ras homolog gene family, member<br>J                                                                                                                       | 2.06  | 1.69E-07 | 6.04E-05 | DOWN |
| LDB2                                                                                         | LIM domain binding 2                                                                                                                                       | 1.94  | 4.45E-08 | 4.60E-05 | DOWN |
| GHR                                                                                          | growth hormone receptor                                                                                                                                    | 1.94  | 4.94E-08 | 4.72E-05 | DOWN |
| ITGA8 <sup>19</sup>                                                                          | integrin, alpha 8                                                                                                                                          | 1.92  | 1.30E-07 | 5.65E-05 | DOWN |
| ABCB1                                                                                        | ATP-binding cassette, sub-family<br>B (MDR/TAP), member 1                                                                                                  | 1.86  | 2.93E-08 | 4.36E-05 | DOWN |
| SEMA5A                                                                                       | sema domain, seven<br>thrombospondin repeats (type 1<br>and type 1-like), transmembrane<br>domain (TM) and short<br>cytoplasmic domain, (semaphorin)<br>5A | 1.86  | 1.28E-05 | 3.55E-04 | DOWN |
| GPM6A                                                                                        | glycoprotein M6A                                                                                                                                           | 1.85  | 5.18E-07 | 8.31E-05 | DOWN |
| GRIA1 <sup>19</sup>                                                                          | glutamate receptor, ionotropic,<br>AMPA 1                                                                                                                  | 1.8   | 3.22E-06 | 1.73E-04 | DOWN |
| PTPRM                                                                                        | protein tyrosine phosphatase,                                                                                                                              | 1.76  | 1.02E-06 | 1.05E-04 | DOWN |

|                                                                                                                            |                                                                         |       |          |          |      |
|----------------------------------------------------------------------------------------------------------------------------|-------------------------------------------------------------------------|-------|----------|----------|------|
|                                                                                                                            | receptor type, M                                                        |       |          |          |      |
| COL29A1                                                                                                                    | collagen, type XXIX, alpha 1                                            | 1.76  | 1.90E-07 | 6.19E-05 | DOWN |
| SLIT3                                                                                                                      | slit homolog 3 (Drosophila)                                             | 1.68  | 4.22E-07 | 7.85E-05 | DOWN |
| <b>S3C) TOP 25 DIFFERENTIALLY METHYLATED LOCI IN PROMOTERS IN THE VICINITY OF DE GENES (WITHIN ADENOCARCINOMAS ONLY)</b>   |                                                                         |       |          |          |      |
| <b>HYPERMETHYLATED</b>                                                                                                     |                                                                         |       |          |          |      |
| RPL23AP32*                                                                                                                 | ribosomal protein L23a pseudogene 32                                    | -1.26 | 5.12E-05 | 1.10E-02 | DOWN |
| CTNNAL1* <sup>19</sup>                                                                                                     | catenin (cadherin-associated protein), alpha-like 1                     | -0.82 | 7.08E-03 | 4.17E-02 | DOWN |
| C6orf155                                                                                                                   |                                                                         | -0.81 | 4.65E-03 | 3.36E-02 | DOWN |
| HBEGF                                                                                                                      | heparin-binding EGF-like growth factor                                  | -0.80 | 2.26E-03 | 2.41E-02 | DOWN |
| TMEM88                                                                                                                     | transmembrane protein 88                                                | -0.78 | 1.82E-04 | 1.17E-02 | DOWN |
| CASP12                                                                                                                     | caspase 12                                                              | -0.73 | 9.58E-05 | 1.11E-02 | DOWN |
| FILIP1                                                                                                                     | filamin A interacting protein 1                                         | -0.73 | 5.15E-06 | 1.10E-02 | DOWN |
| VWF                                                                                                                        | Coagulation Factor VIII                                                 | -0.69 | 3.93E-03 | 3.10E-02 | DOWN |
| CDH5                                                                                                                       | cadherin 5, type 2                                                      | -0.65 | 3.47E-05 | 1.10E-02 | DOWN |
| ITGA8* <sup>19</sup>                                                                                                       | integrin, alpha 8                                                       | -0.65 | 8.36E-03 | 4.56E-02 | DOWN |
| ARHGAP29                                                                                                                   | Rho GTPase activating protein 29                                        | -0.64 | 9.35E-03 | 4.84E-02 | DOWN |
| CLEC3B                                                                                                                     | C-type lectin domain family 3, member B                                 | -0.62 | 7.00E-04 | 1.57E-02 | DOWN |
| CRTAC1                                                                                                                     | cartilage acidic protein 1                                              | -0.61 | 7.53E-03 | 4.31E-02 | DOWN |
| GPR126                                                                                                                     | G-Protein Coupled Receptor 126                                          | -0.60 | 1.43E-03 | 2.00E-02 | DOWN |
| PTPRM                                                                                                                      | protein tyrosine phosphatase, receptor type, M                          | -0.60 | 3.52E-03 | 2.94E-02 | DOWN |
| <b>HYPOMETHYLATED</b>                                                                                                      |                                                                         |       |          |          |      |
| NQO1                                                                                                                       | NAD(P)H dehydrogenase, quinone 1                                        | 1.84  | 6.64E-05 | 1.10E-02 | UP   |
| LOC651751                                                                                                                  |                                                                         | 1.21  | 3.57E-05 | 1.10E-02 | UP   |
| IGKC // IGKC                                                                                                               | immunoglobulin kappa constant                                           | 1.21  | 3.57E-05 | 1.10E-02 | UP   |
| CST1                                                                                                                       | cystatin SN                                                             | 1.11  | 1.90E-04 | 1.18E-02 | UP   |
| XAGE1D                                                                                                                     | Cancer/Testis Antigen 12.1                                              | 1.02  | 4.59E-03 | 3.34E-02 | UP   |
| AIM2                                                                                                                       | Interferon-Inducible Protein and putative tumor suppressor              | 0.74  | 3.72E-03 | 3.02E-02 | UP   |
| MMP11                                                                                                                      | matrix metalloproteinase 11                                             | 0.64  | 3.38E-03 | 2.88E-02 | UP   |
| LGR4                                                                                                                       | Leucine-Rich Repeat Containing G Protein-Coupled Receptor 4             | 0.55  | 8.17E-03 | 4.50E-02 | UP   |
| PVRL4                                                                                                                      | Nectin involved in cell adhesion                                        | 0.42  | 6.03E-03 | 3.84E-02 | UP   |
| EFNA4                                                                                                                      | EPH-Related Receptor Tyrosine Kinase Ligand                             | 0.20  | 2.61E-03 | 2.56E-02 | UP   |
| <b>S3D) TOP 25 DIFFERENTIALLY METHYLATED LOCI IN GENE BODIES IN THE VICINITY OF DE GENES (WITHIN ADENOCARCINOMAS ONLY)</b> |                                                                         |       |          |          |      |
| CP                                                                                                                         | Ceruloplasmin (Ferroxidase)                                             | -1.08 | 2.32E-04 | 1.77E-02 | UP   |
| FAP                                                                                                                        | fibroblast activation protein, alpha                                    | -1.04 | 8.23E-04 | 1.37E-03 | UP   |
| C6orf125                                                                                                                   |                                                                         | -1.00 | 4.99E-04 | 6.65E-06 | UP   |
| NLN                                                                                                                        | Neurolysin (Metalloproteinase)                                          | -0.98 | 7.67E-05 | 1.32E-05 | UP   |
| TPX2                                                                                                                       | TPX2, microtubule-associated, homolog (Xenopus laevis)                  | -0.93 | 1.58E-05 | 2.00E-05 | UP   |
| KIF26B                                                                                                                     | kinesin family member 26B                                               | -0.90 | 4.34E-04 | 1.12E-05 | UP   |
| SLC7A5                                                                                                                     | solute carrier family 7 (amino acid transporter light chain, L system), | -0.85 | 8.50E-03 | 2.31E-05 | UP   |

|                            |                                                      |       |          |          |      |
|----------------------------|------------------------------------------------------|-------|----------|----------|------|
|                            | member 5                                             |       |          |          |      |
| GPR39                      | G protein-coupled receptor 39                        | -0.79 | 1.76E-04 | 6.93E-04 | UP   |
| NELL1                      | Neural Epidermal Growth Factor-Like                  | -0.74 | 3.73E-03 | 4.60E-02 | UP   |
| GREM1 <sup>*</sup>         | gremlin 1, cysteine knot superfamily                 | -0.74 | 5.07E-04 | 6.25E-04 | UP   |
| CDH3                       | cadherin 3, type 1                                   | -0.74 | 5.48E-03 | 1.30E-02 | UP   |
| GFRA3                      | Glial Cell Line-Derived Neurotrophic Factor Receptor | -0.74 | 8.13E-05 | 3.01E-02 | UP   |
| SIX1                       | SIX homeobox 1                                       | -0.74 | 2.22E-03 | 6.59E-03 | UP   |
| <b>HYPOMETHYLATED</b>      |                                                      |       |          |          |      |
| RHOJ <sup>19</sup>         | ras homolog gene family, member J                    | 1.97  | 4.93E-05 | 3.93E-07 | DOWN |
| CDH13 <sup>4, 19, 21</sup> | cadherin 13, H-cadherin (heart)                      | 1.93  | 1.09E-05 | 2.24E-04 | DOWN |
| TSPAN18                    | transmembrane 4 superfamily                          | 1.77  | 2.00E-04 | 8.54E-06 | DOWN |
| PDE1C                      | phosphodiesterase 1C, calmodulin-dependent           | 1.74  | 8.12E-05 | 1.44E-04 | DOWN |
| ANO2                       | anoctamin 2 Transmembrane Protein 16B                | 1.74  | 7.31E-05 | 6.22E-07 | DOWN |
| INMT                       | Indolethylamine N-Methyltransferase                  | 1.69  | 6.56E-05 | 1.46E-06 | DOWN |
| PLCB4                      | phospholipase C, beta 4                              | 1.68  | 1.78E-03 | 6.65E-05 | DOWN |
| LDB2                       | LIM domain binding 2                                 | 1.65  | 1.51E-04 | 3.93E-07 | DOWN |
| GRIA1 <sup>*, 19</sup>     | glutamate receptor, ionotropic, AMPA 1               | 1.64  | 3.33E-04 | 1.87E-06 | DOWN |
| SLIT3                      | slit homolog 3 (Drosophila)                          | 1.63  | 7.44E-05 | 1.68E-04 | DOWN |
| ITGAB <sup>*, 19</sup>     | integrin, alpha 8                                    | 1.61  | 1.59E-04 | 3.92E-05 | DOWN |
| GHR                        | growth hormone receptor                              | 1.59  | 5.45E-05 | 9.02E-06 | DOWN |

DELTA(log2) is the magnitude of differential methylation (HpaII vs MspI in T vs NT)
