# Supplementary material for: Genome Wide Methylome Alterations in Lung Cancer
Source: PubMed Central journal article supplement (PMC4684329; doi:10.1371/journal.pone.0143826), 2015-12-18
Supplement: pone.0143826.s012.pdf [file pone.0143826.s012.pdf]

**Supplementary Table 5. Promoter CGI and CGS distinction in DMxDE analysis**

| <b>Data Set</b> | <b>Compartment</b> | <b># DM loci within 2 kb of DE genes</b> | <b># loci associated with Hypermethylation and Downregulation of corresponding gene</b> | <b># loci associated with Hypomethylation and Upregulation of corresponding gene</b> | <b>% Loci</b> |
|-----------------|--------------------|------------------------------------------|-----------------------------------------------------------------------------------------|--------------------------------------------------------------------------------------|---------------|
| All Histologies | CG Islands         | 158                                      | 6                                                                                       | 0                                                                                    | 4             |
|                 | CG Shores          | 289                                      | 6                                                                                       | 1                                                                                    | 2             |
| Adenocarcinomas | CG Islands         | 107                                      | 11                                                                                      | 0                                                                                    | 11            |
|                 | CG Shores          | 213                                      | 5                                                                                       | 0                                                                                    | 3             |

Methylation x Expression relationships were examined in DM loci within CG islands and CG shores. A small percentage of DM loci within CGI and CGS demonstrated canonical relationships between DM and DE.
