# Supplementary material for: Genome Wide Methylome Alterations in Lung Cancer
Source: PubMed Central journal article supplement (PMC4684329; doi:10.1371/journal.pone.0143826), 2015-12-18
Supplement: pone.0143826.s013.pdf [file pone.0143826.s013.pdf]

**Supplementary Table 6: Summary of IPA Analyses**

| Histology | Compartment | Change | # loci | # Genes | # Genes associated with Cancer | B-H adj p-value of enriched canonical pathway | DM Loci forming hubs/nodes in cancer-related network           |
|-----------|-------------|--------|--------|---------|--------------------------------|-----------------------------------------------|----------------------------------------------------------------|
| ALL       | PR          | DM     | 1300   | 1079    | 313                            | >0.05                                         | NA                                                             |
| ALL       | GB          | DM     | 42109  | 4968    | 1480                           | 0.000000149*                                  | DNMT1, DNMT3A, CDKN2B, CDH1 (Hypermethylated)                  |
| ADENO     | PR          | DM     | 1670   | 1150    | 324                            | >0.05                                         | NA                                                             |
| ADENO     | GB          | DM     | 40136  | 4163    | 1179                           | 0.0152*                                       | LRRK2, SVIL, AR, (Hypomethylated) CAST, MCM2 (Hypermethylated) |
| ALL       | PR          | DM+DE  | 51     | 37      | 20                             | >0.05                                         | NA                                                             |
| ALL       | GB          | DM+DE  | 2244   | 220     | 104                            | >0.05                                         | NA                                                             |
| ADENO     | PR          | DM+DE  | 118    | 71      | 34                             | 0.000157**                                    | NQO1 (Hypomethylated) VWF, HBEGF, DACH1, (Hypermethylated)     |
| ADENO     | GB          | DM+DE  | 3598   | 302     | 128                            | >0.05                                         | NA                                                             |

\* Molecular Mechanisms of Cancer

\*\* Axonal Guidance Signaling
