# Supplementary material for: Genome Wide Methylome Alterations in Lung Cancer
Source: PubMed Central journal article supplement (PMC4684329; doi:10.1371/journal.pone.0143826), 2015-12-18
Supplement: pone.0143826.s014.pdf [file pone.0143826.s014.pdf]

**Supplementary Table 7. Discrimination Stability of DM loci set**

Table 7A: Whole data set top 100 DM loci classification results for each testing set.

| Iteration # | True Positive | True Negative | False Negative | False Positive | Sensitivity | Specificity | Accuracy |
|-------------|---------------|---------------|----------------|----------------|-------------|-------------|----------|
| 1           | 6             | 6             | 1              | 1              | 0.8571      | 0.8571      | 0.8571   |
| 2           | 5             | 6             | 2              | 1              | 0.7143      | 0.8571      | 0.7857   |
| 3           | 6             | 6             | 1              | 1              | 0.8571      | 0.8571      | 0.8571   |
| 4           | 6             | 6             | 1              | 1              | 0.8571      | 0.8571      | 0.8571   |
| 5           | 7             | 7             | 0              | 0              | 1.0000      | 1.0000      | 1.0000   |
| 6           | 7             | 7             | 0              | 0              | 1.0000      | 1.0000      | 1.0000   |
| 7           | 5             | 7             | 2              | 0              | 0.7143      | 1.0000      | 0.8571   |
| 8           | 5             | 7             | 2              | 0              | 0.7143      | 1.0000      | 0.8571   |
| 9           | 3             | 7             | 4              | 0              | 0.4286      | 1.0000      | 0.7143   |
| 10          | 6             | 7             | 1              | 0              | 0.8571      | 1.0000      | 0.9286   |
| Average     |               |               |                |                | 0.8000      | 0.9429      | 0.8714   |

Table 7B: Whole data set top 25 DM loci classification results for each testing set

| Iteration # | True Positive | True Negative | False Negative | False Positive | Sensitivity | Specificity | Accuracy |
|-------------|---------------|---------------|----------------|----------------|-------------|-------------|----------|
| 1           | 5             | 7             | 2              | 0              | 0.7143      | 1.0000      | 0.8571   |
| 2           | 4             | 7             | 3              | 0              | 0.5714      | 1.0000      | 0.7857   |
| 3           | 7             | 7             | 0              | 0              | 1.0000      | 1.0000      | 1.0000   |
| 4           | 6             | 6             | 1              | 1              | 0.8571      | 0.8571      | 0.8571   |
| 5           | 7             | 7             | 0              | 0              | 1.0000      | 1.0000      | 1.0000   |
| 6           | 6             | 7             | 1              | 0              | 0.8571      | 1.0000      | 0.9286   |
| 7           | 5             | 7             | 2              | 0              | 0.7143      | 1.0000      | 0.8571   |
| 8           | 6             | 7             | 1              | 0              | 0.8571      | 1.0000      | 0.9286   |
| 9           | 6             | 7             | 1              | 0              | 0.8571      | 1.0000      | 0.9286   |
| 10          | 5             | 7             | 2              | 0              | 0.7143      | 1.0000      | 0.8571   |
| Average     |               |               |                |                | 0.8143      | 0.9857      | 0.9000   |
