# Supplementary material for: Genome Wide Methylome Alterations in Lung Cancer
Source: PLOS journal article supplement (doi:10.1371/journal.pone.0143826), 2015-12-18
Supplement: S11 (10.1371/journal.pone.0143826.s011) [file journal.pone.0143826.s011]

**Supplementary Table 4. Primers used.**

| Gene          | Primer                            | Size (bp) |
|---------------|-----------------------------------|-----------|
| <i>HBEGF</i>  | forward:<br>TTGTGCTCAAGGAATCGGCT  | 114       |
|               | reverse:<br>CAACTGGGGACGAAGGAGTC  |           |
| <i>TMEM88</i> | forward:<br>GCCTGCGCTGTTCTTGTAAC  | 100       |
|               | reverse:<br>CAACTGGGGACGAAGGAGTC  |           |
| <i>CASP12</i> | forward:<br>GGACCAAGCACTGGGATCAA  | 201       |
|               | reverse:<br>GCAAGAGCCGACCATGAGTA  |           |
| <i>FILIP1</i> | forward:<br>CCTGGTGCAAGCAAAGTGAC  | 83        |
|               | reverse:<br>CCTGACACTGACTGGGTTCC  |           |
| <i>VWF</i>    | forward:<br>GTGTGTCCGAGTGAAGGAGG  | 117       |
|               | reverse:<br>CAGCACGCTGAGGTCTTACA  |           |
| <i>NQO1</i>   | forward:<br>GGATTGGACCGAGCTGGAAA  | 199       |
|               | reverse:<br>CAAACCTGAAACACCCAGCCG |           |
| <i>CST1</i>   | forward:<br>GTCCGCTGCGGGTACTAA    | 191       |
|               | reverse:<br>GTTCTCCCAGGGAACCTTCGT |           |
| <i>XAGE1D</i> | forward:<br>CCGGCGTCAAGGTGAA      | 111       |
|               | reverse:<br>ACCAGCTTGCGTTGTTTCAG  |           |

Quantitative real-time RT-PCR (RT-qPCR) for the most dysregulated genes was performed with Power SYBR Green PCR master mix in a 96-well optical plate using an ABI 7500 real-time PCR system (all from Life Technologies, Carlsbad, CA). All RT-qPCR primers and product size are listed above. The reaction condition was 95C 10min, then 95C, 15s, 64C, 20s, 72C, 45s for 45 cycles. The qPCR was performed in technical triplicates for each sample. Additional ddH<sub>2</sub>O blank and RNA without reverse transcriptase samples served as negative controls for each gene. Melting analysis for one additional cycle was performed. Where necessary, an RNA-specific strategy that avoids contaminating genomic DNA amplification and false positives was used
